# Supplementary material for: Breastfeeding is not a risk factor for clinical severity in Autism spectrum disorder in children from the ELENA cohort
Source: PubMed Central journal article supplement (PMC9842713; doi:10.1038/s41598-022-27040-x), 2023-01-16
Supplement: 41598_2022_27040_MOESM1_ESM.pdf [file 41598_2022_27040_MOESM1_ESM.pdf]

# **Breastfeeding is not a risk factor for clinical severity in Autism Spectrum Disorder in children from the ELENA cohort**

*Scientific Report*

Marianne Peries<sup>1,2,3</sup>, Fanny Duhr<sup>1</sup>, Marie-Christine Picot<sup>4,3,2</sup>, Barbara Heude<sup>5</sup>, Jonathan Y. Bernard<sup>5,6</sup>,  
Amaria Baghdadli<sup>1,2,3,7</sup>

<sup>1</sup> Centre de Ressource Autisme Languedoc-Roussillon, CHU Montpellier, Montpellier, France

<sup>2</sup> Centre d'Excellence sur l'Autisme et les Troubles Neuro-développementaux, CHU Montpellier, France

<sup>3</sup> Université Paris-Saclay, UVSQ, Inserm, CESP, Team DevPsy, 94807, Villejuif, France

<sup>4</sup> Clinical research and epidemiology unit, Department of Medical Information, University Hospital, CHU Montpellier, France

<sup>5</sup> Université Paris Cité, Inserm, INRAE, Centre de Recherche en Épidémiologie et Statistiques, F-7005 Paris, France

<sup>6</sup> Singapore Institute for Clinical Sciences (SICS), Agency for Science, Technology and Research (A\*STAR), Singapore, Singapore

<sup>7</sup> Faculté de Médecine, Université de Montpellier, France

**Corresponding author:** Amaria BAGHDADLI, Centre de Ressource Autisme Languedoc-Roussillon et Centre d'Excellence sur l'Autisme et les Troubles Neuro-développementaux (CeAND), 39 Avenue Charles Flahaut, 34295 Montpellier cedex 05, France. Tel: +33467330986 ; Fax: +33467330832 ; E-mail address: [rech-clinique-autisme@chu-montpellier.fr](mailto:rech-clinique-autisme@chu-montpellier.fr)

**Supplementary Table S1.** Description of missing data for each confounders included in the multiple imputation models

| <b>Confounders</b>                        | <b>Missing value<br/>n (%)</b> |
|-------------------------------------------|--------------------------------|
| Mothers' age (years)                      | 0                              |
| Mother's tobacco smoking during pregnancy | 3 (1.2)                        |
| Mother's obesity before pregnancy         | 8 (3.3)                        |
| Child's sex                               | 0                              |
| Gestational age (weeks)                   | 16 (6.6)                       |
| Parental education level                  | 1 (0.41)                       |
| Number of older siblings                  | 4 (1.64)                       |
| Parental socioeconomic status (SES)       | 2 (0.8)                        |

**Supplementary Table S2.** Comparison of clinical characteristics at inclusion between participants considered in the analyses and the other participants involved in the ELENA Cohort

|                                                      |                                            | <b>Participants included<br/>in our study<br/>(n = 243)</b> | <b>Other participants<br/>included in ELENA<br/>Cohort<br/>(n = 633)</b> | <b>p value</b> |
|------------------------------------------------------|--------------------------------------------|-------------------------------------------------------------|--------------------------------------------------------------------------|----------------|
| <b><u>Children characteristics at assessment</u></b> |                                            |                                                             |                                                                          |                |
| <b>Age</b> (years)                                   |                                            | 5.8 (±3.4)                                                  | 6.0 (±3.3)                                                               | 0.34           |
| <b>Sex</b>                                           |                                            |                                                             |                                                                          |                |
|                                                      | <i>Boy</i>                                 | 199 (81.9%)                                                 | 525 (82.9%)                                                              | 0.72           |
|                                                      | <i>Girl</i>                                | 44 (18.1%)                                                  | 108 (17.1%)                                                              |                |
| <b>Intellectual quotient</b>                         |                                            | <b>77.1 (±28.0)</b>                                         | <b>71.3 (±25.7)</b>                                                      | <b>0.01</b>    |
| <b>VABS-II standard scores</b>                       |                                            |                                                             |                                                                          |                |
|                                                      | <i>Communication SS</i>                    | <b>72.6 (±15.5)</b>                                         | <b>68.9 (±15.2)<sup>a</sup></b>                                          | <b>0.001</b>   |
|                                                      | <i>Daily living skills SS</i>              | <b>75.6 (±12.8)</b>                                         | <b>72.5 (±12.7)</b>                                                      | <b>0.001</b>   |
|                                                      | <i>Social skills SS</i>                    | 70.9 (±10.6)                                                | 69.5 (±10.8) <sup>a</sup>                                                | 0.20           |
| <b>Level of autism spectrum (ADOS-2 CSS)</b>         |                                            |                                                             |                                                                          |                |
|                                                      | <i>No evidence to low related symptoms</i> | 29 (13.7%) <sup>b</sup>                                     | 61 (10.8%) <sup>c</sup>                                                  | 0.47           |
|                                                      | <i>Moderate related symptoms</i>           | 100 (47.1%)                                                 | 263 (46.6%)                                                              |                |
|                                                      | <i>High related symptoms</i>               | 83 (39.2%)                                                  | 240 (42.6%)                                                              |                |
| <b>ABC</b>                                           |                                            |                                                             |                                                                          |                |
|                                                      | <i>Irritability / aggressiveness</i>       | 31.1 (17.8 - 46.7) <sup>d</sup>                             | 31.1 (17.8 - 47.8) <sup>g</sup>                                          | 0.55           |
|                                                      | <i>Lethargy / social withdrawal</i>        | 25.0 (12.5 - 35.4) <sup>e</sup>                             | 25.0 (14.6 - 37.5) <sup>h</sup>                                          | 0.56           |
|                                                      | <i>Stereotyped behaviors / self-harm</i>   | 23.8 (9.5 - 47.6) <sup>e</sup>                              | 28.6 (14.3 - 52.4) <sup>h</sup>                                          | 0.10           |
|                                                      | <i>Hyperactivity / lack of cooperation</i> | 43.8 (20.8 - 64.6) <sup>e</sup>                             | 43.6 (27.1 - 60.4) <sup>i</sup>                                          | 0.88           |
| <b>SRS-2 T-score</b>                                 |                                            | 94.9 (±19.0) <sup>f</sup>                                   | 93.9 (±18.3) <sup>j</sup>                                                | 0.62           |
| <b><u>Parents characteristics</u></b>                |                                            |                                                             |                                                                          |                |
| <b>Age at birth</b> (years)                          |                                            |                                                             |                                                                          |                |
|                                                      | <i>Mother</i>                              | 31.8 (±5.4)                                                 | 31.2 (±5.4)                                                              | 0.24           |
|                                                      | <i>Father</i>                              | 35.3 (±7.3)                                                 | 34.2 (±6.4)                                                              | 0.16           |
| <b>Mother's education level</b>                      |                                            |                                                             |                                                                          |                |
|                                                      | <i>High school or lower</i>                | 66 (34.4%)                                                  | 145 (41.4%)                                                              | 0.11           |
|                                                      | <i>University</i>                          | 126 (65.5%)                                                 | 205 (58.6%)                                                              |                |
| <b>Father's education level</b>                      |                                            |                                                             |                                                                          |                |
|                                                      | <i>High school or lower</i>                | 91 (47.6%)                                                  | 168 (49.1%)                                                              | 0.74           |
|                                                      | <i>University</i>                          | 100 (52.4%)                                                 | 174 (50.9%)                                                              |                |

Data are presented as the mean (±SD), median (IQR), or n (%).

<sup>a</sup> 1 missing value, <sup>b</sup> 31 missing values, <sup>c</sup> 69 missing values, <sup>d</sup> 59 missing values, <sup>e</sup> 58 missing values, <sup>f</sup> 95 missing values, <sup>g</sup> 321 missing values, <sup>h</sup> 323 missing values, <sup>i</sup> 320 missing values, <sup>j</sup> 410 missing values

ADOS-2 CSS, autism diagnostic observation schedule second version calibrate severity scale; VABS-II, Vineland second version; ABC, Aberrant Behavior Checklist; SRS-2, Social-Responsiveness Scale, second version.

**Supplementary Table S3.** Association between predominant and any breastfeeding in tertiles and ASD clinical severity at inclusion

|                                           | Predominant Breastfeeding              |                                              |                                           |         | Any Breastfeeding                      |                                            |                                         |         |
|-------------------------------------------|----------------------------------------|----------------------------------------------|-------------------------------------------|---------|----------------------------------------|--------------------------------------------|-----------------------------------------|---------|
|                                           | Low tertile<br>(<2 months)<br>(N = 60) | Middle tertile<br>(2-4.5 months)<br>(N = 76) | High tertile<br>(≥4.5 months)<br>(N = 41) | P value | Low tertile<br>(<3 months)<br>(N = 62) | Middle tertile<br>(3-8 months)<br>(N = 61) | High tertile<br>(≥8 months)<br>(N = 54) | P value |
| <b>Intellectual quotient</b>              |                                        |                                              |                                           |         |                                        |                                            |                                         |         |
| <i>IQ</i>                                 | 74.0 (±24.4)                           | 82.2 (±30.7)                                 | 77.2 (±27.1)                              | 0.23    | 77.5 (±24.4)                           | 76.2 (±30.0)                               | 81.4 (±29.6)                            | 0.60    |
| <b>VABS-II standard scores</b>            |                                        |                                              |                                           |         |                                        |                                            |                                         |         |
| <i>Communication</i>                      | 73.8 (±14.0)                           | 74.8 (±14.3)                                 | 71.5 (±18.4)                              | 0.53    | 74.5 (±14.1)                           | 71.8 (±14.9)                               | 74.9 (±16.8)                            | 0.47    |
| <i>Daily living skills</i>                | 77.9 (±11.7)                           | 76.9 (±13.0)                                 | 76.4 (±13.9)                              | 0.82    | 76.9 (±11.8)                           | 77.4 (±13.2)                               | 77.1 (±13.5)                            | 0.98    |
| <i>Socialization</i>                      | 73.0 (±10.4)                           | 70.1 (±11.3)                                 | 71.4 (±12.1)                              | 0.33    | 71.3 (±11.3)                           | 71.23 (±11.4)                              | 71.54 (±11.1)                           | 0.99    |
| <b>ADOS-2 CSS</b>                         |                                        |                                              |                                           |         |                                        |                                            |                                         |         |
|                                           | 7.0 (±1.5)                             | 6.6 (±2.3)                                   | 6.9 (±1.8)                                | 0.75    | 6.8 (±1.9)                             | 7.2 (±1.9)                                 | 6.4 (±2.0)                              | 0.09    |
| <b>ABC</b>                                |                                        |                                              |                                           |         |                                        |                                            |                                         |         |
| <i>Irritability/ aggressiveness</i>       | 26.7 (11.1 - 40.0)                     | 33.3 (20.0 - 51.1) <sup>a</sup>              | 37.8 (20.0 - 44.4)                        | 0.14    | 26.7 (13.3 - 46.7)                     | 31.1 (13.3 - 42.2) <sup>a</sup>            | 37.8 (20.0 - 48.9)                      | 0.30    |
| <i>Lethargy/ social withdrawal</i>        | 22.9 (12.5 - 35.4)                     | 22.9 (10.4 - 41.7)                           | 27.1 (12.5 - 35.4)                        | 0.85    | 22.9 (12.5 - 43.8)                     | 22.9 (10.4 - 38.5)                         | 25.0 (12.5 - 31.3)                      | 0.91    |
| <i>Stereotyped behaviors/ self-harm</i>   | 19.1 (4.8 - 42.9)                      | 28.6 (9.5 - 47.6)                            | 23.8 (9.5 - 52.4)                         | 0.28    | 28.6 (9.5 - 47.6)                      | 26.2 (9.5 - 47.6)                          | 23.8 (9.5 - 42.9)                       | 0.99    |
| <i>Hyperactivity/ lack of cooperation</i> | 35.4 (20.8 - 62.5)                     | 45.8 (20.8 - 68.8)                           | 50.0 (37.5 - 64.6)                        | 0.23    | 37.5 (22.9 - 64.6)                     | 43.8 (22.9 - 65.6)                         | 50.0 (31.3 - 66.7)                      | 0.63    |
| <b>SRS-2 T-score</b>                      |                                        |                                              |                                           |         |                                        |                                            |                                         |         |
|                                           | 93.3 (±18.1)                           | 93.8 (±17.9)                                 | 99.7 (±21.7)                              | 0.38    | 93.3 (±18.6)                           | 98.7 (±18.7)                               | 91.9 (±19.1)                            | 0.26    |

Data are presented as the mean (±SD) or median (IQR).

<sup>a</sup> 1 missing value

VABS-II, Vineland second version; ADOS-2 CSS, autism diagnostic observation schedule second version calibrate severity scale; ABC, Aberrant Behavior Checklist; SRS-2, Social-Responsiveness Scale, second version.
